# Supplementary material
Source: Springer Nature journal article supplement (https://www.springermedizin.de/resource/supplementary/13023_2013_597_MOESM4_ESM.pdf/9642494)

# Subject 1

# Subject 2

A

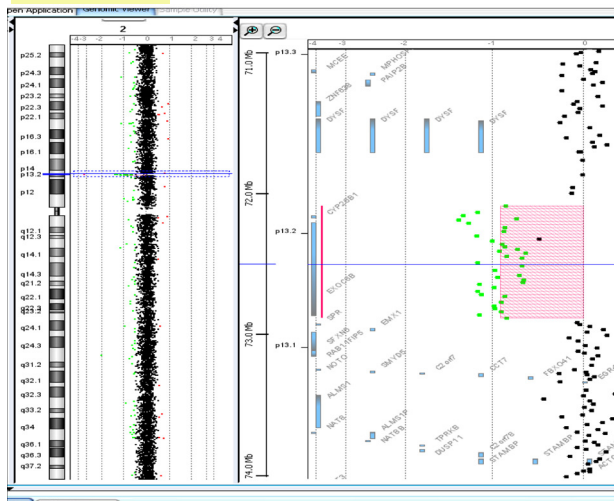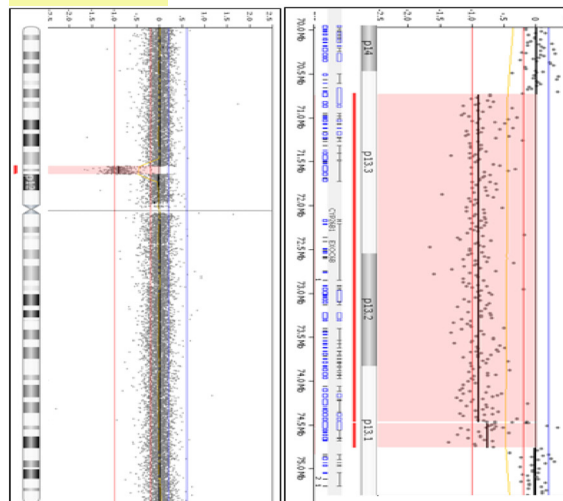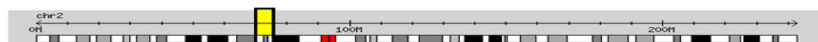

B

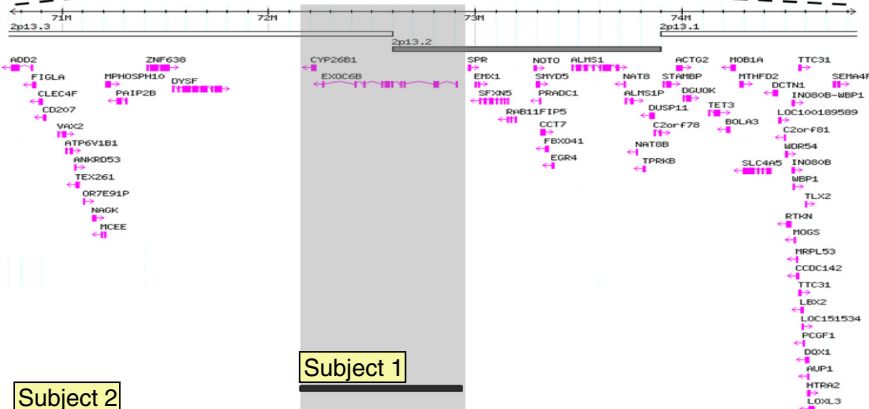

Subject 1

Subject 2

Supplement: MOESM4 [file 9642494]
